# Supplementary material for: Household and area-level social determinants of multimorbidity: a systematic review
Source: PubMed Central journal article supplement (PMC7892392; doi:10.1136/jech-2020-214691), 2020-11-06
Supplement: jech-2020-214691supp004.pdf [file jech-2020-214691supp004.pdf]

**Appendix 4: Key study characteristics (n=41)**

| First Author<br>(Year)                       | Country     | Participants |           | SDoH Exposure(s)                                  |                           | Multimorbidity Outcome(s)                                                |                   |                           |
|----------------------------------------------|-------------|--------------|-----------|---------------------------------------------------|---------------------------|--------------------------------------------------------------------------|-------------------|---------------------------|
|                                              |             | No.          | Age range | SDoH Investigated                                 | Method of data collection | Definition <sup>a</sup>                                                  | No. of conditions | Method of data collection |
| <b><i>Cross-sectional studies</i></b>        |             |              |           |                                                   |                           |                                                                          |                   |                           |
| <b>Agborsangaya (2012)</b> <sup>61</sup>     | Canada      | 4980         | ≥18       | Household: income, composition                    | Self-report               | Presence of 2 or more chronic conditions                                 | 16                | Self-report               |
| <b>Agborsangaya (2013)</b> <sup>62</sup>     | Canada      | 4803         | ≥18       | Household: income                                 | Self-report               | Concurrent occurrence of 2 or more chronic conditions in same individual | 16                | Self-report               |
| <b>Arbelle (2014)</b> <sup>63</sup>          | Israel      | 1972798      | 0-85+     | Area-level: deprivation                           | Poverty index             | 2 or more of these morbidities in one patient                            | 40                | EHRs screened             |
| <b>Bahler (2015)</b> <sup>64</sup>           | Switzerland | 229493       | ≥65       | Area-level: deprivation                           | Polling data              | 2 or more chronic conditions in one person                               | 22                | EHRs screened             |
| <b>Barnett (2012)</b> <sup>22</sup>          | Scotland    | 1751841      | 0-85+     | Area-level: deprivation                           | Carstairs index           | 2 or more morbidities in one patient                                     | 40                | EHRs screened             |
| <b>Chung (2015)</b> <sup>65</sup>            | Hong Kong   | 25780        | ≥15       | Household: income, tenure                         | Self-report               | 2 or more chronic health conditions                                      | 46                | Self-report               |
| <b>Foguet-Boreu (2014)</b> <sup>36</sup>     | Spain       | 1749710      | ≥19       | Area-level: Rurality                              | Assigned by researcher    | Coexistence of 2 or more chronic diseases                                | 146               | EHRs screened             |
| <b>Hayek (2017)</b> <sup>68</sup>            | Israel      | 4325         | ≥21       | Household: income                                 | Self-report               | 2 or more physician-diagnosed conditions                                 | 10                | Self-report               |
| <b>Johnson-Lawrence (2017)</b> <sup>69</sup> | USA         | 115097       | 30-64     | Household: income, tenure                         | Self-report               | 2 or more conditions                                                     | 9                 | Self-report               |
| <b>Laires (2018)</b> <sup>41</sup>           | Portugal    | 15196        | 25-79     | Household: income                                 | Unclear                   | 2 or more of these chronic conditions                                    | 13                | Self-report               |
| <b>Lebenbaum (2018)</b> <sup>66</sup>        | Canada      | 288300       | ≥18       | Household: income, tenure<br>Area-level: rurality | Self-report               | At least 2 chronic conditions                                            | 10                | Self-report               |
| <b>Li (2016)</b> <sup>42</sup>               | England     | 27806        | 16-85     | Area-level: deprivation                           | IMD (2010)                | At least 2 of the listed conditions                                      | 12 (+ 'other')    | Self-report               |
| <b>McLean (2014)</b> <sup>44</sup>           | Scotland    | 1272685      | ≥25       | Area-level: deprivation                           | Carstairs index           | Coexistence of 2 or more chronic conditions                              | 40                | EHRs screened             |

|                                              |             |          |       |                                                            |                                    |                                                           |                  |                             |
|----------------------------------------------|-------------|----------|-------|------------------------------------------------------------|------------------------------------|-----------------------------------------------------------|------------------|-----------------------------|
| <b>Moin (2018)</b> <sup>46</sup>             | Canada      | 12516587 | ≥50   | Area-level: deprivation                                    | ON-Marg Index                      | Co-occurrence of 2+ (and 3+) chronic conditions           | 18               | EHRs screened               |
| <b>Neilsen (2017)</b> <sup>48</sup>          | Multiple    | 63842    | ≥50   | Household: income                                          | Self-report                        | Coexistence of 2 or more chronic conditions               | 12               | Self-report                 |
| <b>Orueta (2013)</b> <sup>50</sup>           | Spain       | 452698   | ≥65   | Area-level: deprivation                                    | Deprivation index                  | Co-occurrence of 2 or more (or 3 or more) health problems | 47               | EHRs screened               |
| <b>Orueta (2013)</b> <sup>49</sup>           | Spain       | 2262286  | 0-75  | Area-level: socioeconomic inequality                       | Deprivation index                  | Number of chronic conditions                              | 52               | EHRs screened               |
| <b>Orueta (2014)</b> <sup>51</sup>           | Spain       | 2262698  | 0-85  | Area-level: deprivation                                    | Deprivation index                  | Coexistence of 2 or more conditions in the same patient   | 52               | EHRs screened               |
| <b>Prazeres (2015)</b> <sup>52</sup>         | Portugal    | 1993     | ≥18   | Household: income, composition<br>Area-level: rurality     | Self-report                        | Presence of ≥2 or ≥3 chronic health problems              | 147 <sub>a</sub> | Self-report + EHRs screened |
| <b>Roberts (2015)</b> <sup>53</sup>          | Canada      | 105416   | ≥20   | Household: income, education level<br>Area-level: rurality | Self-report (unclear for rurality) | 2 or more, and 3 or more, chronic diseases                | 9                | Self-report                 |
| <b>Ryan (2018)</b> <sup>54</sup>             | Canada      | 13581191 | 0-105 | Area-level: deprivation                                    | ON-Marg Index                      | Presence of 3 or more chronic conditions                  | 17               | EHRs screened               |
| <b>Sinnott (2015)</b> <sup>56</sup>          | Ireland     | 2047     | 50-69 | Household: dysfunction in childhood (e.g. divorce)         | Self-report                        | 2 or more chronic diseases                                | 20               | Self-report                 |
| <b>Stanley (2018)</b> <sup>57</sup>          | New Zealand | 3489747  | ≥18   | Area-level: deprivation                                    | NZDep index (2013)                 | At least 2 conditions from 2 different condition lists    | 61 and 30        | EHRs screened               |
| <b>Stokes (2018)</b> <sup>67</sup>           | New Zealand | 232      | ≥35   | Area-level: deprivation                                    | NZDep index (year unclear)         | Presence of 2 or more morbidities in one patient          | 31               | EHRs screened               |
| <b>Verest (2019)</b> <sup>59</sup>           | Netherlands | 22362    | 18-70 | Household: income                                          | Self-report                        | 2 or more chronic diseases                                | 21               | Self-report                 |
| <b>Violan (2014)</b> <sup>35</sup>           | Spain       | 1356761  | ≥19   | Area-level: deprivation                                    | Deprivation index                  | Coexistence of 2 or more chronic conditions               | 146 <sub>a</sub> | EHRs screened               |
| <b><i>Longitudinal Studies</i></b>           |             |          |       |                                                            |                                    |                                                           |                  |                             |
| <b>Cantarero-Prieto (2018)</b> <sup>70</sup> | Multiple    | 31536    | ≥50   | Household: composition<br>Area-level: rurality             | Interviewed (no further details)   | 3 or more chronic diseases                                | 14               | Self-report                 |
| <b>Cassell (2018)</b> <sup>4</sup>           | England     | 403985   | ≥18   | Area-level: deprivation                                    | IMD (year unclear)                 | 2 or more currently active long-term conditions           | 36               | EHRs screened               |
| <b>Charlton (2013)</b> <sup>34</sup>         | England     | 282887   | ≥30   | Area-level: deprivation                                    | IMD (2010)                         | Dual (2 conditions) and triple (3) morbidity              | 5                | EHRs screened               |

|                                           |             |       |        |                                                                 |                                 |                                                                  |                         |                               |
|-------------------------------------------|-------------|-------|--------|-----------------------------------------------------------------|---------------------------------|------------------------------------------------------------------|-------------------------|-------------------------------|
| <b>Henchoz (2019)</b> <sup>37</sup>       | Switzerland | 4055  | 65-70  | Household: childhood financial hardship, composition            | Self-report                     | Co-occurrence of 2 or more medical conditions                    | 13                      | Self-report                   |
| <b>Humphreys (2018)</b> <sup>38</sup>     | England     | 1979  | 64-68  | Household: paternal social class at birth (based on occupation) | Self-report                     | Total number of multi-morbid conditions                          | 10                      | Self-report                   |
| <b>Johnston (2019)</b> <sup>72</sup>      | Scotland    | 6561  | N/A    | Household: paternal social class at birth (based on occupation) | Self-report                     | 2 or more self-reported conditions                               | N/A                     | Self-report                   |
| <b>Katikireddi (2017)</b> <sup>39</sup>   | Scotland    | 10083 | 18-75  | Household: income<br>Area-level: deprivation                    | Self-report and Carstairs index | 2 or more of the relevant conditions                             | 40                      | Self-report                   |
| <b>Ki (2017)</b> <sup>40</sup>            | Korea       | 9971  | ≥30    | Household: relative poverty (based on income)                   | Self-report                     | Number of chronic diseases                                       | 66                      | Self-report                   |
| <b>Lujic (2017)</b> <sup>43</sup>         | Australia   | 90352 | ≥45    | Household: income, language<br>Area-level: rurality             | Self-report                     | 2 or more chronic conditions                                     | 8                       | Self-report and EHRs screened |
| <b>Melis (2014)</b> <sup>45</sup>         | Sweden      | 390   | ≥75    | Household: composition                                          | Self-report                     | Co-occurrence of 2 or more chronic conditions                    | 38                      | Physicians determination      |
| <b>Mounce (2018)</b> <sup>47</sup>        | England     | 5564  | ≥50    | Household: composition                                          | Self-report                     | 2 or more conditions                                             | 15                      | Self-report                   |
| <b>Salisbury (2011)</b> <sup>55</sup>     | England     | 99997 | ≥18    | Area-level: deprivation                                         | Townsend index                  | More than 1 chronic condition                                    | 17 (+114 <sub>a</sub> ) | EHRs screened                 |
| <b>Schäfer (2012)</b> <sup>60</sup>       | Germany     | 3189  | 65-84  | Household: income, tenure, composition                          | Self-report                     | Number of chronic conditions                                     | 29                      | EHRs screened                 |
| <b>Tomasdottir (2016)</b> <sup>58</sup>   | Norway      | 20365 | 20-59  | Area-level: distrust in neighbours                              | Self-report                     | 2 or more coinciding chronic diseases within the same individual | 17                      | Self-report                   |
| <b>Tucker-Seeley (2011)</b> <sup>71</sup> | USA         | 7305  | 50-75+ | Household: childhood financial hardship                         | Self-report                     | Count of chronic conditions                                      | 6                       | Self-report                   |

**Note:** SDoH = social determinants of health; EHRs = electronic health records; IMD = Index of Multiple Deprivation; ON-Marg = Ontario marginalisation index; NZDep = New Zealand's deprivation index  
<sup>a</sup>Definition(s) of multimorbidity are taken as direct quotes from each paper
